# Supplementary material for: Genetic and Epigenetic Regulation of the Smoothened Gene (SMO) in Cancer Cells
Source: PubMed Central journal article supplement (PMC7464114; doi:10.3390/cancers12082219), 2020-08-08
Supplement: cancers-12-02219-s001.pdf [file cancers-12-02219-s001.pdf]

Supplementary Materials

# Genetic and Epigenetic Regulation of the Smoothed Gene (SMO) in Cancer Cells

Hong Lou, Hongchuan Li, Andrew R. Huehn, Nadya I. Tarasova, Bahara Saleh, Stephen K. Anderson and Michael Dean

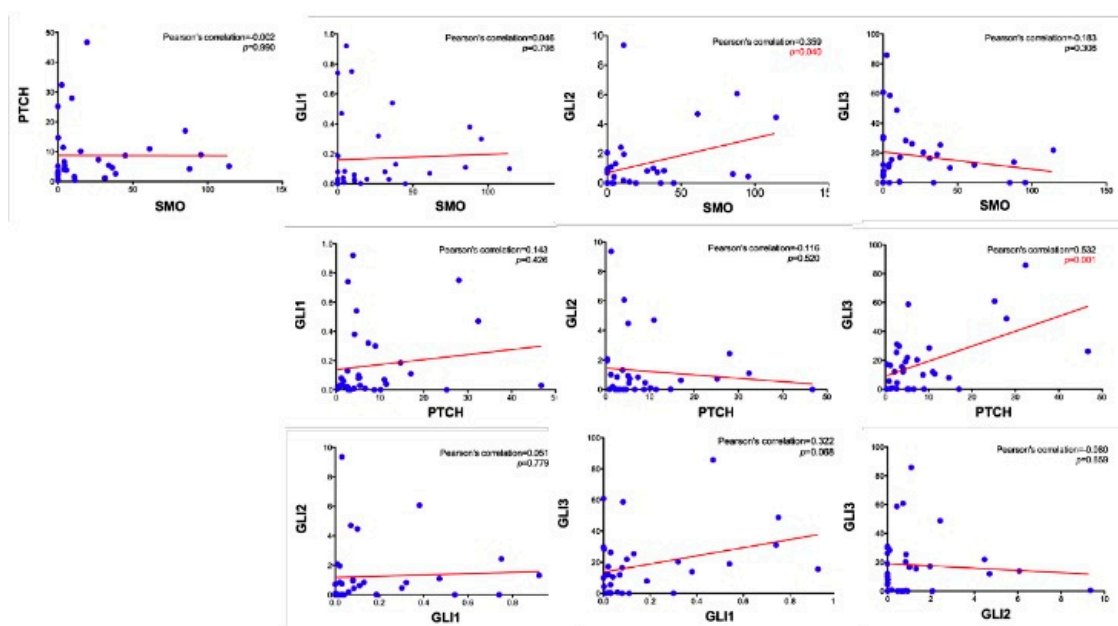

**Figure S1.** Pearson's correlation analysis of gene expression levels of SMO, PTCH, GLI1, GLI2, and GLI3 in cancer cells. Pearson's correlation coefficients were performed to estimate the correlations of mRNA expression levels using the JMP program.

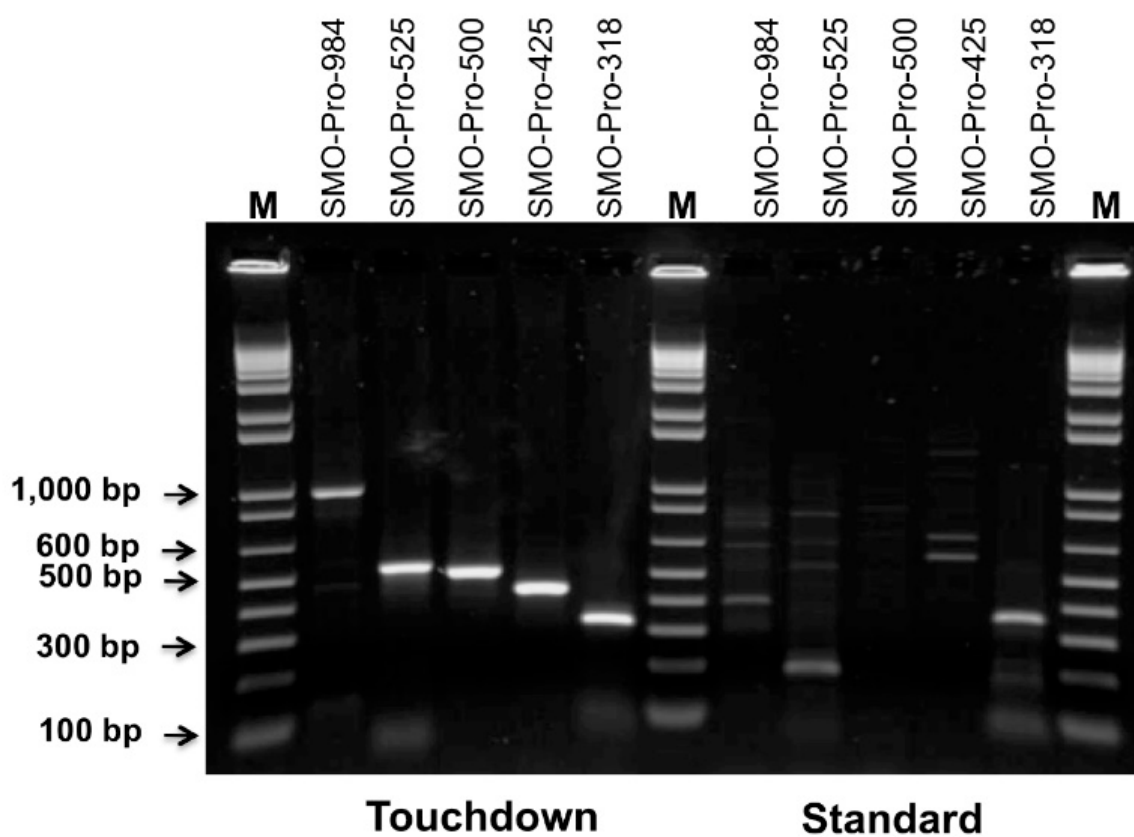

**Figure S2.** Comparison of PCR conditions to amplify SMO promoter sequence in BT549 DNA. The figure showed PCR products from the five different primer sets used in the 5'-deletion assay to amplify 984bp, 525bp, 500bp, 425bp, and 318bp fragments of the SMO promoter (M&M section), respectively. Equal amounts (15  $\mu$ l) were loaded on a 1.0% agarose gel. Left panel showed PCR results from the touchdown PCR, and right panel showed PCR results from the standard PCR program. Lane M, molecular weight marker (1kb plus DNA ladder).

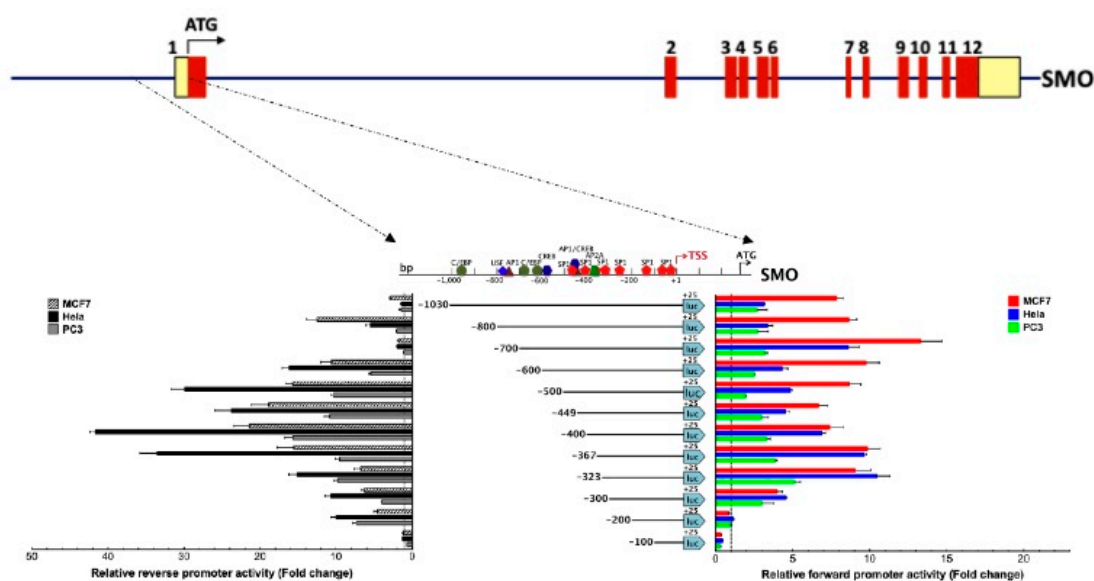

**Figure S3.** Identification of SMO promoters by 5' truncation analysis. A schematic representation of the SMO bidirectional element is shown with the potential transcription factor binding sites. Serial

deletions at the 5' end of the promoter fragment of SMO are shown. The luciferase activity of pGL3 constructs containing fragments cloned in either the reverse (left panel) or forward (right panel) orientation is shown as fold-increase of corrected light units relative to an empty pGL3 vector control [48]. Values represent the mean $\pm$ SEM of at least three independent experiments.

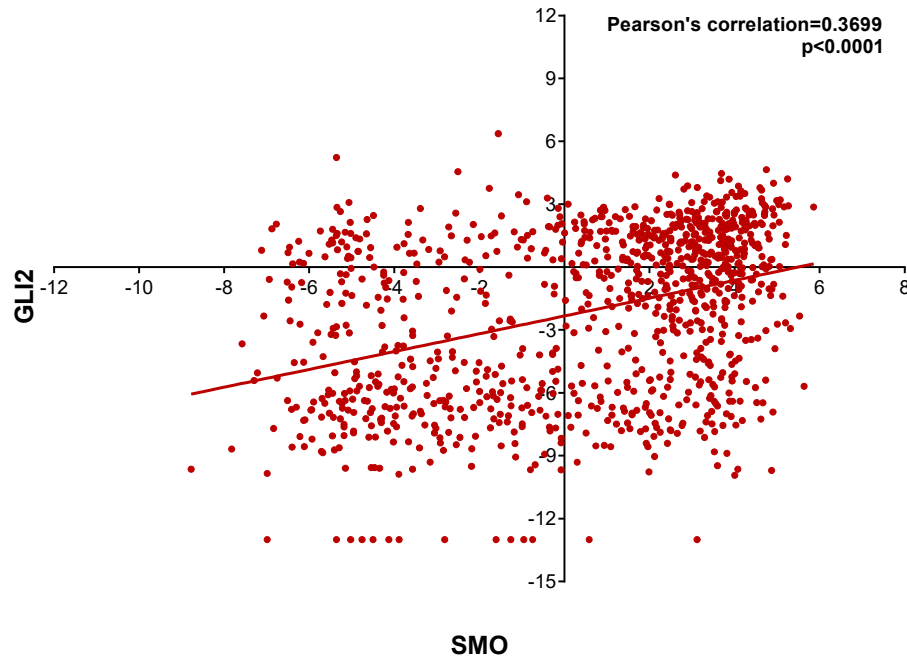

**Figure S4.** Pearson's correlation analysis of gene expression levels of SMO and GLI2 in 1119 cancer cells from the Cancer Cell Line Encyclopedia (<https://portals.broadinstitute.org/ccle>). Pearson's correlation coefficients were performed to estimate the correlation of mRNA expression level from the cell lines using the JMP program.

**Table S1.** Sequence of primers used in this study.

| <b>Amplicon</b>            | <b>Direction</b> | <b>Primer Name</b> | <b>Sequence (5'→3')</b>       | <b>Length</b> |
|----------------------------|------------------|--------------------|-------------------------------|---------------|
| 5'-deletion reporter assay |                  |                    |                               |               |
|                            | Forward          | SMO-Pro-959-Fwd    | AATGAGCAGAGTGGGGAAGA          | 984 bp        |
|                            | Forward          | SMO-Pro-500-Fwd    | ACCTCAGACCAAGCAAGGTGC         | 525 bp        |
|                            | Forward          | SMO-Pro-475-Fwd    | CGAGTCTCTCCTTGCAGGTC          | 500 bp        |
|                            | Forward          | SMO-Pro-400-Fwd    | GGTCACCAGATCCCCCTAG           | 425 bp        |
|                            | Forward          | SMO-Pro-293-Fwd    | CCCTCCCCCAGCCTCGGCG           | 318 bp        |
|                            | Reverse          | SMO-Pro+25-Rev     | TCGCAATCCAAGTTGTCTTCAGCCC     |               |
| 3'-deletion assay          |                  |                    |                               |               |
|                            | Forward          | SMO-Pro-500-Fwd    | ACCTCAGACCAAGCAAGGTGC         |               |
|                            | Reverse          | SMO-Pro+52-Rev     | GGATGCACGACTCCCCAAGC          | 552 bp        |
|                            | Reverse          | SMO-Pro+25-Rev     | TCGCAATCCAAGTTGTCTTCAGCCC     | 525 bp        |
|                            | Reverse          | SMO-Pro+15-Rev     | AGTTGTCTTCAGCCCTAGGAGACC      | 515 bp        |
| MSP                        |                  |                    |                               |               |
| SMO unmethylated           | Forward          | SMO-MSP-UF         | TTTTTGTAGTTTAATATGGGTTTGG     | 132 bp        |
|                            | Reverse          | SMO-MSP-UR         | AAAAACAACCTCAAACAACCTATAACACC |               |
| SMO methylated             | Forward          | SMO-MSP-MF         | TTTTCGTAGTTTAATATGGGTTTCGG    | 132 bp        |
|                            | Reverse          | SMO-MSP-MR         | GAAAACGACTCAAACGACCTATAACG    |               |
| Actin-beta                 |                  |                    |                               |               |
|                            | Forward          | ACTB Forward       | TGGTGATGGAGGAGGTTTAGTAAGT     | 133 bp        |
|                            | Reverse          | ACTB Reverse       | AACCAATAAAACCTACTCCTCCCTTAA   |               |
| BSP                        |                  |                    |                               |               |
| SMO CpG Island 1           | Forward          | Smobis1*           | GAYGATTTTAGATTAAGTAAGGTGTT    | 464 bp        |
|                            | Reverse          | Smobis3*           | TTYGTGTATTTTAGAGAGTTTAG       |               |
| SMO CpG Island 2           | Forward          | SMOBSP-CpG2-F1     | GGGTTTTTTAGGGTTGAAGATAATT     | 359 bp        |
|                            | Reverse          | SMOBSP-CpG2-R      | CAACAACAACAACAACAACAAC        |               |
| SMO CpG Island 3           | Forward          | SMOBSP-CpG3-F1     | GGGTTGTTGTTGTTGTTGTTGT        | 351 bp        |
|                            | Reverse          | SMOBSP-CpG3-R      | TCCAAAAATACCCCCATCTTAC        |               |

**Table S2.** Expression level of hedgehog pathway genes in NCI-60 tumor cell lines.

| Cell Lines  | SMO    | PTCH1 | GLI1  | Tissue Type            |
|-------------|--------|-------|-------|------------------------|
| BT549       | 15.80  | 3.51  | 2.31  | Breast                 |
| HS578T      | 28.31  | 3.34  | 4.28  | Breast                 |
| MB-231      | 0.00   | 9.84  | 0.01  | Breast                 |
| MCF7        | 0.00   | 8.70  | 0.30  | Breast                 |
| MDA-MB-468  | 33.40  | 12.54 | 0.31  | Breast                 |
| T47D        | 10.52  | 1.29  | 0.02  | Breast                 |
| SF-295      | 10.51  | 3.69  | 1.20  | Central Nervous System |
| SF-539      | 28.42  | 1.47  | 1.03  | Central Nervous System |
| SF-268      | 54.06  | 5.61  | 0.26  | Central Nervous System |
| SNB-75      | 16.22  | 8.57  | 1.49  | Central Nervous System |
| SNB-19      | 54.04  | 5.98  | 0.08  | Central Nervous System |
| U251        | 26.99  | 3.65  | 0.28  | Central Nervous System |
| COLO 205    | 0.00   | 19.50 | 0.08  | Colon                  |
| HCC-2998    | 5.80   | 12.19 | 0.35  | Colon                  |
| HCT-116     | 11.05  | 3.73  | 0.81  | Colon                  |
| HCT-15      | 0.00   | 25.31 | 0.57  | Colon                  |
| HT29        | 0.00   | 7.37  | 0.14  | Colon                  |
| KM12        | 0.00   | 7.60  | 0.30  | Colon                  |
| SW-620      | 10.89  | 6.59  | 0.12  | Colon                  |
| CCRF-CEM    | 7.74   | 6.98  | 0.30  | Leukemia               |
| HL-60       | 0.68   | 16.05 | 0.11  | Leukemia               |
| K-562       | 0.05   | 9.08  | 0.42  | Leukemia               |
| MOLT-4      | 50.59  | 0.77  | 0.65  | Leukemia               |
| RPMI-8226   | 0.00   | 5.87  | 0.52  | Leukemia               |
| SR          | 0.00   | 2.59  | 0.08  | Leukemia               |
| LOXIMVI     | 0.00   | 12.43 | 0.32  | Melanoma               |
| M14         | 27.70  | 28.70 | 0.11  | Melanoma               |
| MALME-3M    | 82.34  | 10.22 | 0.02  | Melanoma               |
| SK-MEL-2    | 1.46   | 12.54 | 0.42  | Melanoma               |
| SK-MEL-28   | 36.82  | 7.68  | 0.09  | Melanoma               |
| SK-MEL-5    | 39.20  | 2.32  | 0.09  | Melanoma               |
| UACC-257    | 23.80  | 11.61 | 0.10  | Melanoma               |
| UACC-62     | 4.55   | 6.84  | 0.09  | Melanoma               |
| MB-435      | 1.62   | 6.94  | 0.36  | Melanoma               |
| A549        | 27.97  | 10.24 | 4.38  | Lung                   |
| EKVX        | 55.94  | 15.70 | 1.93  | Lung                   |
| HOP62       | 58.73  | 7.86  | 0.04  | Lung                   |
| HOP92       | 0.24   | 11.37 | 0.03  | Lung                   |
| NCI-H23     | 45.91  | 7.93  | 7.07  | Lung                   |
| NCI-H322M   | 22.33  | 8.18  | 0.07  | Lung                   |
| NCI-H460    | 14.67  | 7.97  | 0.24  | Lung                   |
| NCI-H522    | 95.11  | 24.67 | 19.59 | Lung                   |
| NCI-H226    | 39.24  | 2.18  | 0.34  | Lung                   |
| IGROV1      | 26.99  | 15.06 | 0.21  | Ovarian                |
| OVCAR-4     | 11.55  | 11.49 | 0.30  | Ovarian                |
| OVCAR-3     | 101.82 | 11.08 | 0.27  | Ovarian                |
| OVCAR-5     | 43.24  | 3.00  | 1.42  | Ovarian                |
| OVCAR-8     | 20.87  | 1.84  | 0.22  | Ovarian                |
| SK-OV3      | 118.43 | 3.89  | 6.67  | Ovarian                |
| NCI/ADR-RES | 45.60  | 2.81  | 0.74  | Ovarian                |
| DU145       | 8.62   | 4.39  | 0.22  | Prostate               |
| PC3         | 7.06   | 1.53  | 0.02  | Prostate               |
| 786-0       | 14.89  | 15.03 | 0.72  | Kidney                 |
| A498        | 25.93  | 5.15  | 0.37  | Kidney                 |
| ACHN        | 25.12  | 52.13 | 0.26  | Kidney                 |
| CAKI-1      | 49.40  | 7.40  | 0.12  | Kidney                 |
| RXF-393     | 28.95  | 13.10 | 0.30  | Kidney                 |
| SN12C       | 96.86  | 5.04  | 0.09  | Kidney                 |
| TK-10       | 51.34  | 11.78 | 0.72  | Kidney                 |
| UO-31       | 9.16   | 1.05  | 0.04  | Kidney                 |

Abbreviation: ND, not detectable; \*: Relative mRNA Expression = (Target gene/18sRNA) ×10e6.

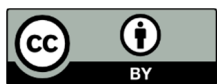

© 2020 by the authors. Licensee MDPI, Basel, Switzerland. This article is an open access article distributed under the terms and conditions of the Creative Commons Attribution (CC BY) license (<http://creativecommons.org/licenses/by/4.0/>).
